# Supplementary figures and images for: Evolution of gremlin 2 in cetartiodactyl mammals: gene loss coincides with lack of upper jaw incisors in ruminants
Source: PeerJ journal article supplement (doi:10.7717/peerj.2901), 2017-01-26

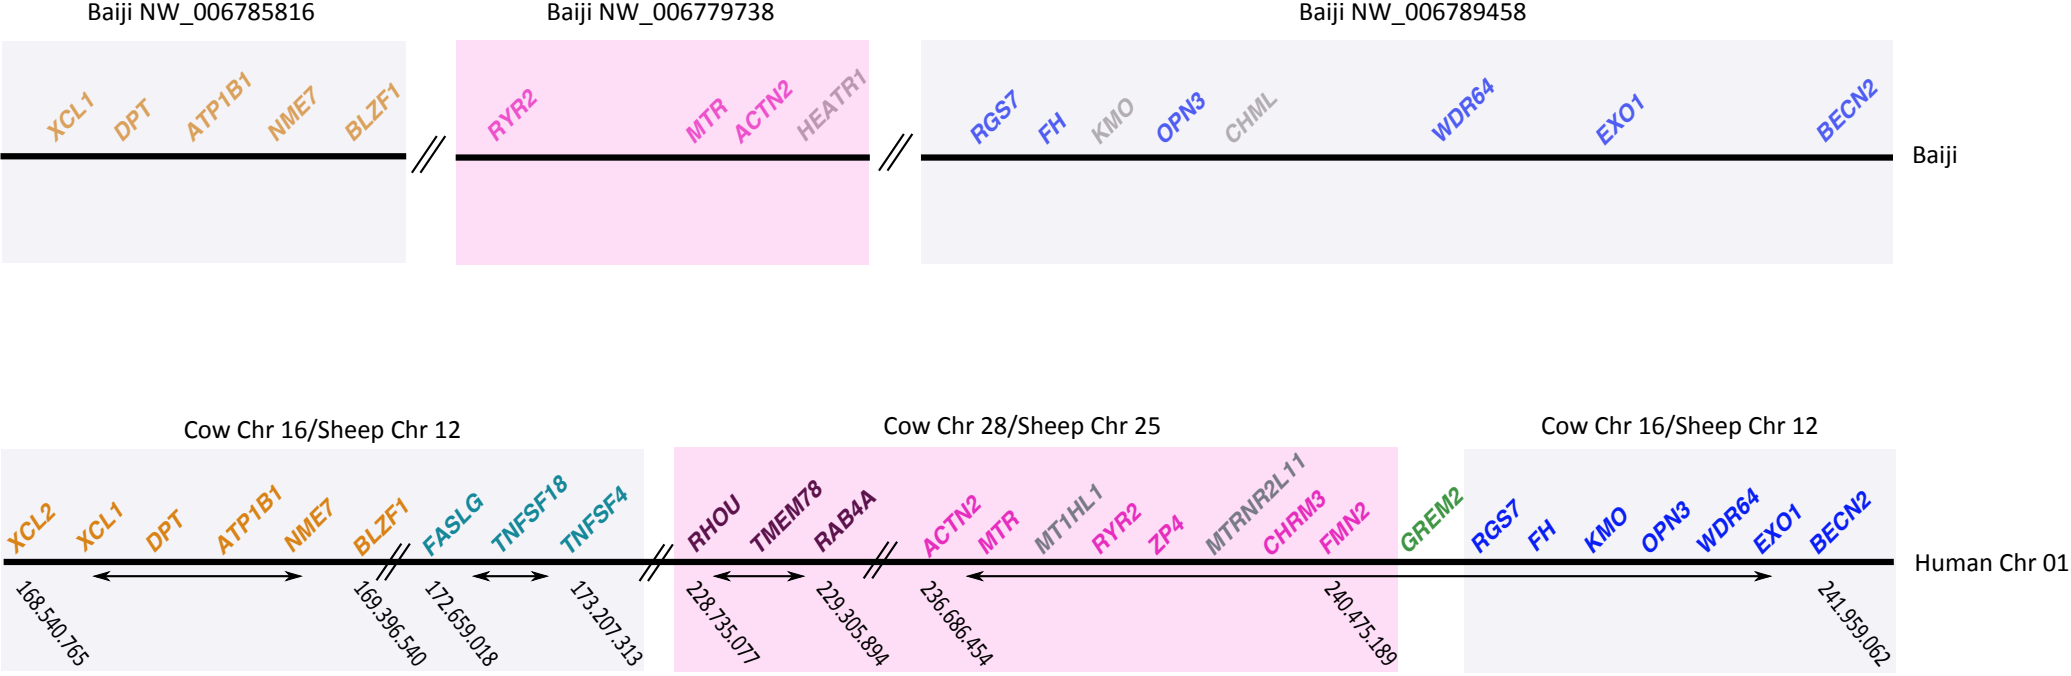

Supplement: Supplementary_Information.zip [file Supplementary_Information.zip]
